# Supplementary material for: Sequence signatures of two public antibody clonotypes that bind SARS-CoV-2 receptor binding domain
Source: PubMed Central journal article supplement (PMC8217500; doi:10.1038/s41467-021-24123-7), 2021-06-21
Supplement: 41467_2021_24123_MOESM3_ESM.pdf [file 41467_2021_24123_MOESM3_ESM.pdf]

### **Description of Additional Supplementary Files**

File Name: Supplementary Data 1

Description: List of IGHV3-53/3-66 RBD antibodies

File Name: Supplementary Data 2

Description: Counts, enrichment in expression and enrichment in binding data from deep sequencing of sorted cells

File Name: Supplementary Data 3

Description: List of 143 oligonucleotides for the construction of the B38 antibody yeast display library
